# Supplementary material for: Secreted Secondary Metabolites Reduce Bacterial Wilt Severity of Tomato in Bacterial–Fungal Co-Infections
Source: MDPI journal article supplement (doi:10.3390/microorganisms9102123), 2021-10-09
Supplement: s1 [file s1]

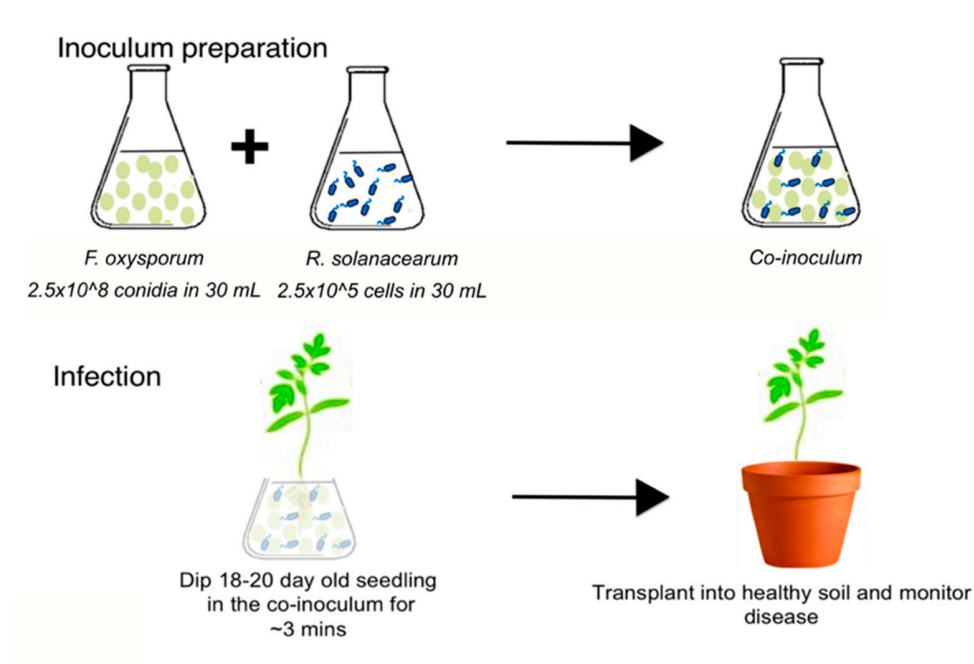

**Figure S1. Schematic for co-infection of tomato seedlings.** *Fusarium oxysporum* conidia are raised in PDB for 6 days at 30 °C with constant shaking at 250 rpm, post inoculation with two plugs of the fungus grown on PDA for 5 days. *R. solanacearum* is raised as overnight cultures by inoculating a single colony into 4 mL CPG broth at 30 °C with constant shaking at 250 rpm. The bacterial cells are harvested at OD>1.0.

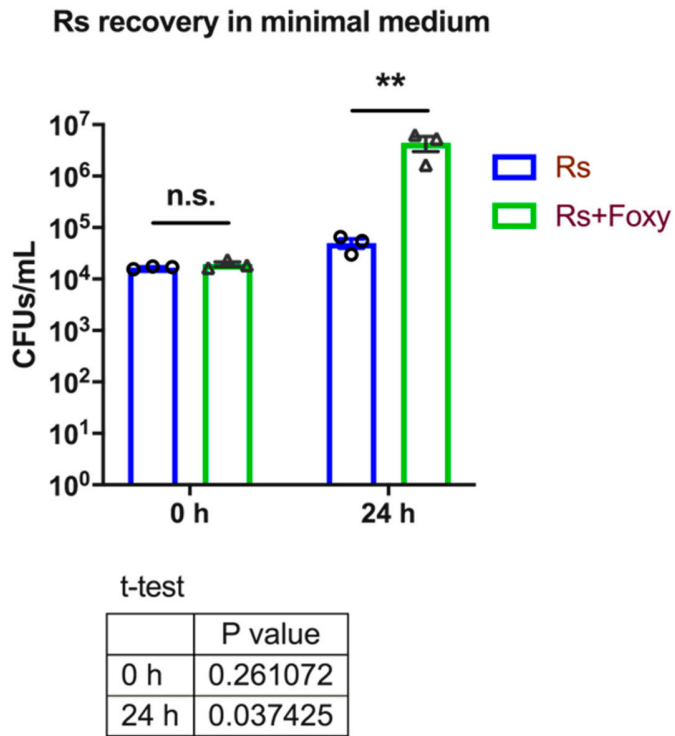

**Figure S2. *R. solanacearum* growth is not inhibited in *in vitro* co-cultures.** The figure shows colony forming units (CFUs) of *R. solanacearum* in single (Rs) and co-cultures with *F. oxysporum* (Rs+Foxy). Independent t-test was performed for each time point and the p-values are reported.

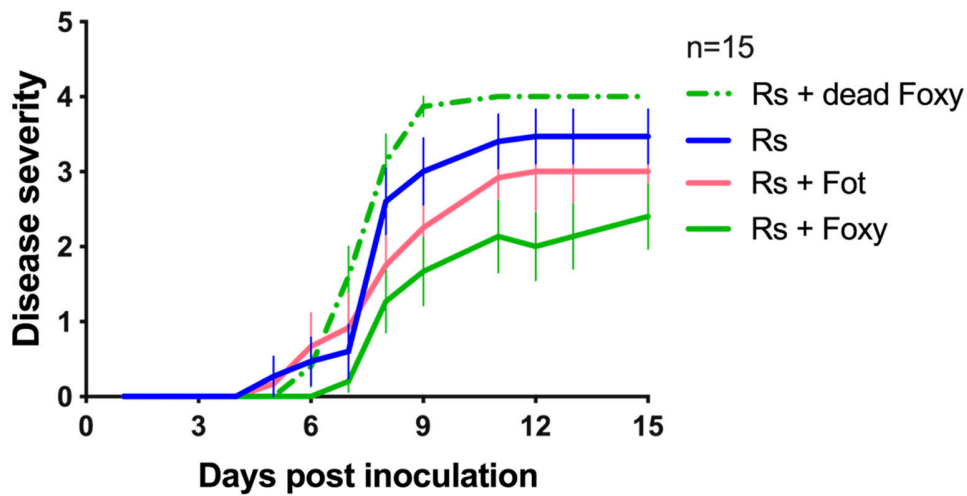

Two-way ANOVA Treatment x time: \*\*p=0.0005

| Tukey's multiple comparisons test |         |                  |
|-----------------------------------|---------|------------------|
|                                   | Summary | Adjusted P Value |
| Rs vs. Rs + Foxy                  | ****    | <0.0001          |
| Rs vs. Rs + Fot                   | ns      | 0.2136           |
| Rs vs. Rs + dead Foxy             | *       | 0.0227           |
| Rs + Foxy vs. Rs + Fot            | **      | 0.0013           |
| Rs + Foxy vs. Rs + dead Foxy      | ****    | <0.0001          |
| Rs + Fot vs. Rs + dead Foxy       | ****    | <0.0001          |

**Figure S3. Reduction in bacterial wilt during co-infection requires active and specific interactions with *F. oxysporum f. sp. lycopersici*.** Disease severity is calculated based on scores assigned daily. Rs + dead Foxy refers to co-infections of tomato plants with *R. solanacearum* and heat-killed *F. oxysporum* spores (60 °C for 8 hours). Rs + Fot refers to co-infection of tomato plants with *R. solanacearum* and *F. oxysporum f. sp. tulipae* which cannot infect tomato. All statistical analyses and p-values are listed in the figure.

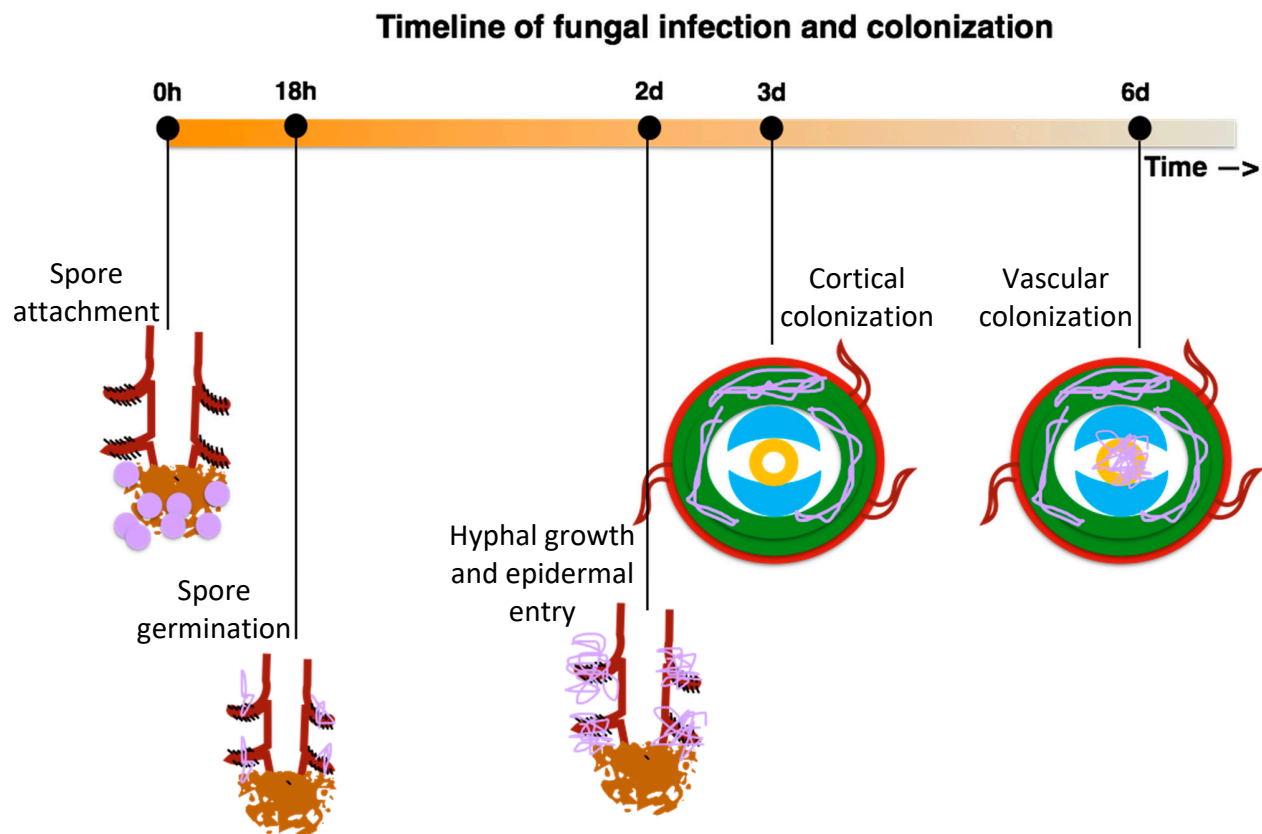

**Figure S4. A timeline for *F. oxysporum* infection.** The infection timeline begins from recognition of the host until colonization of the xylem, gathered from available literature. References used here include Olivain et al. 2006 [1] and Lagopodi et al. 2002 [2].

(A)

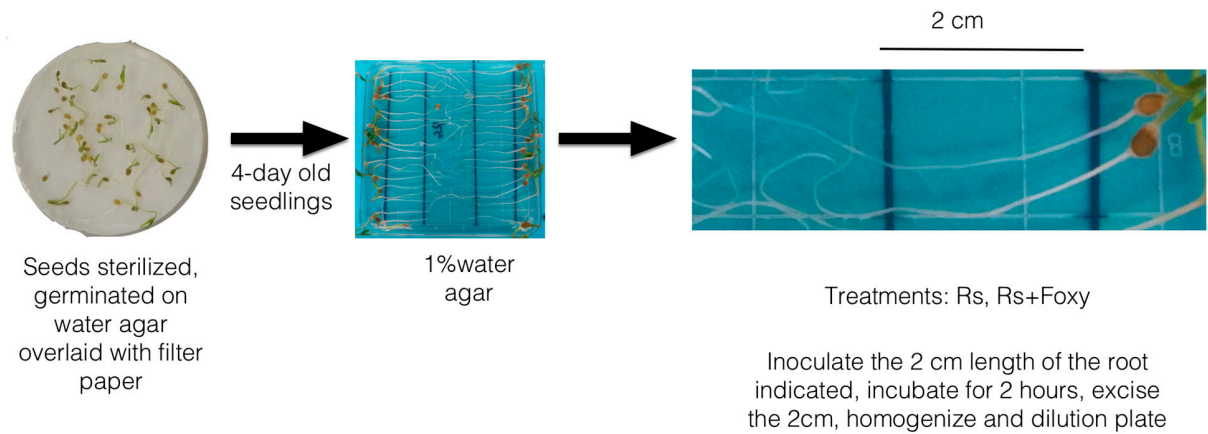

(B)

Rs attachment to roots

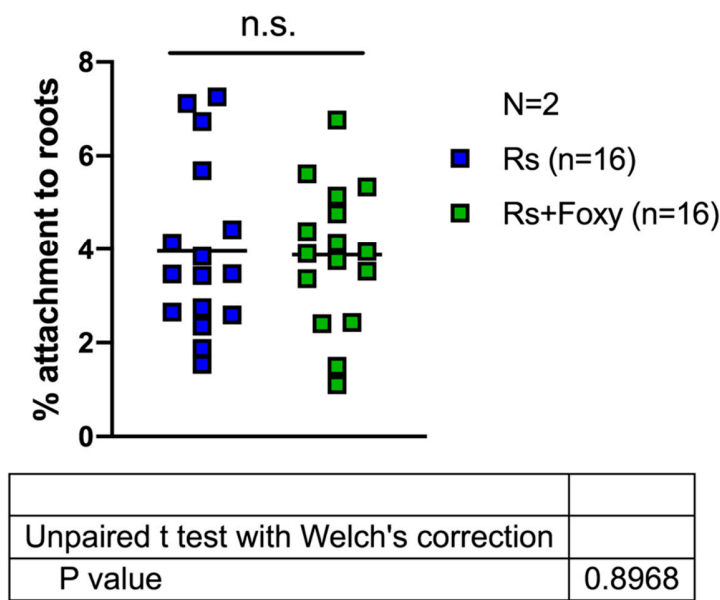

**Figure S5. Assessment of *R. solanacearum* attachment to roots.** (A) Schematic for quantification of *R. solanacearum* attachment to roots. (B) CFUs of *R. solanacearum* obtained from single infections (Rs) and co-infections (Rs+Foxy). The normality of the data was tested with the Shapiro-Wilk normality test.

(A)

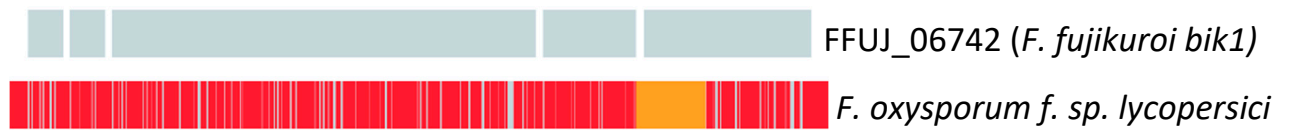

(B)

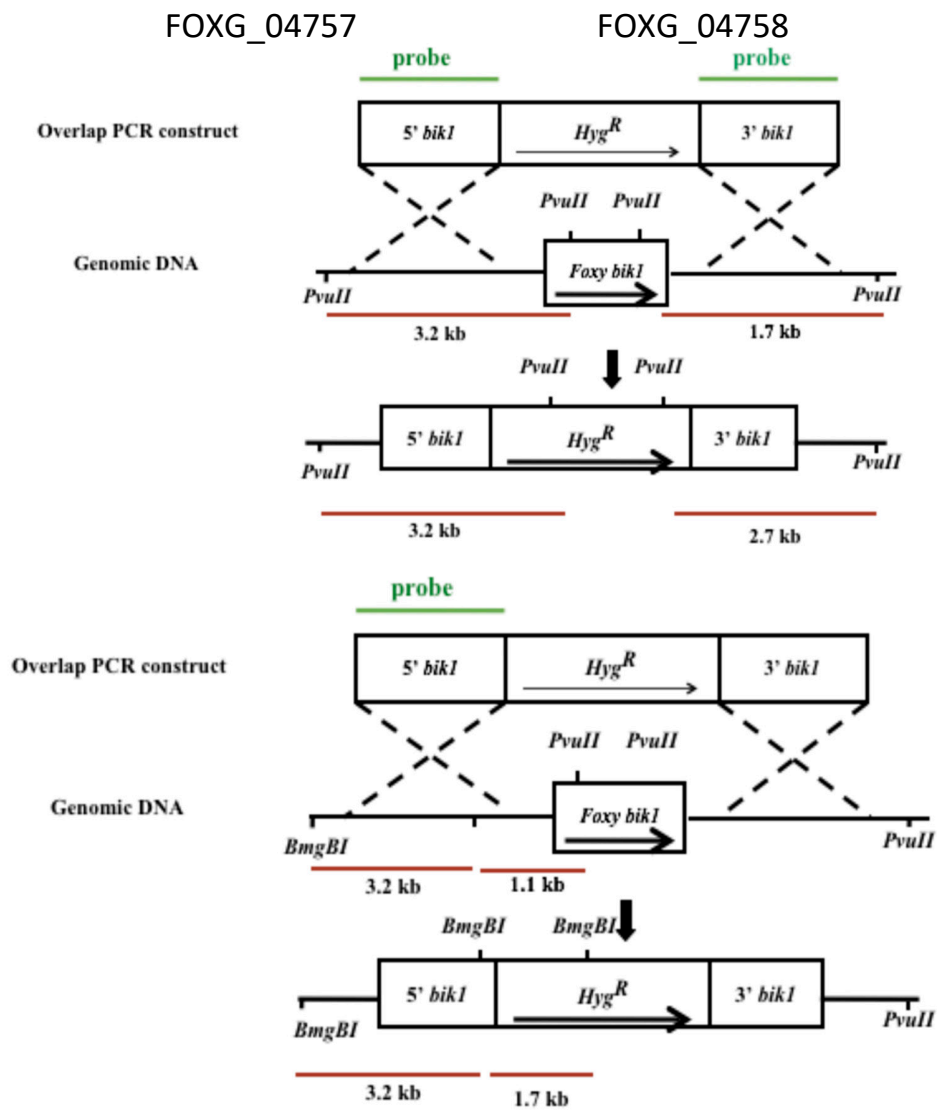

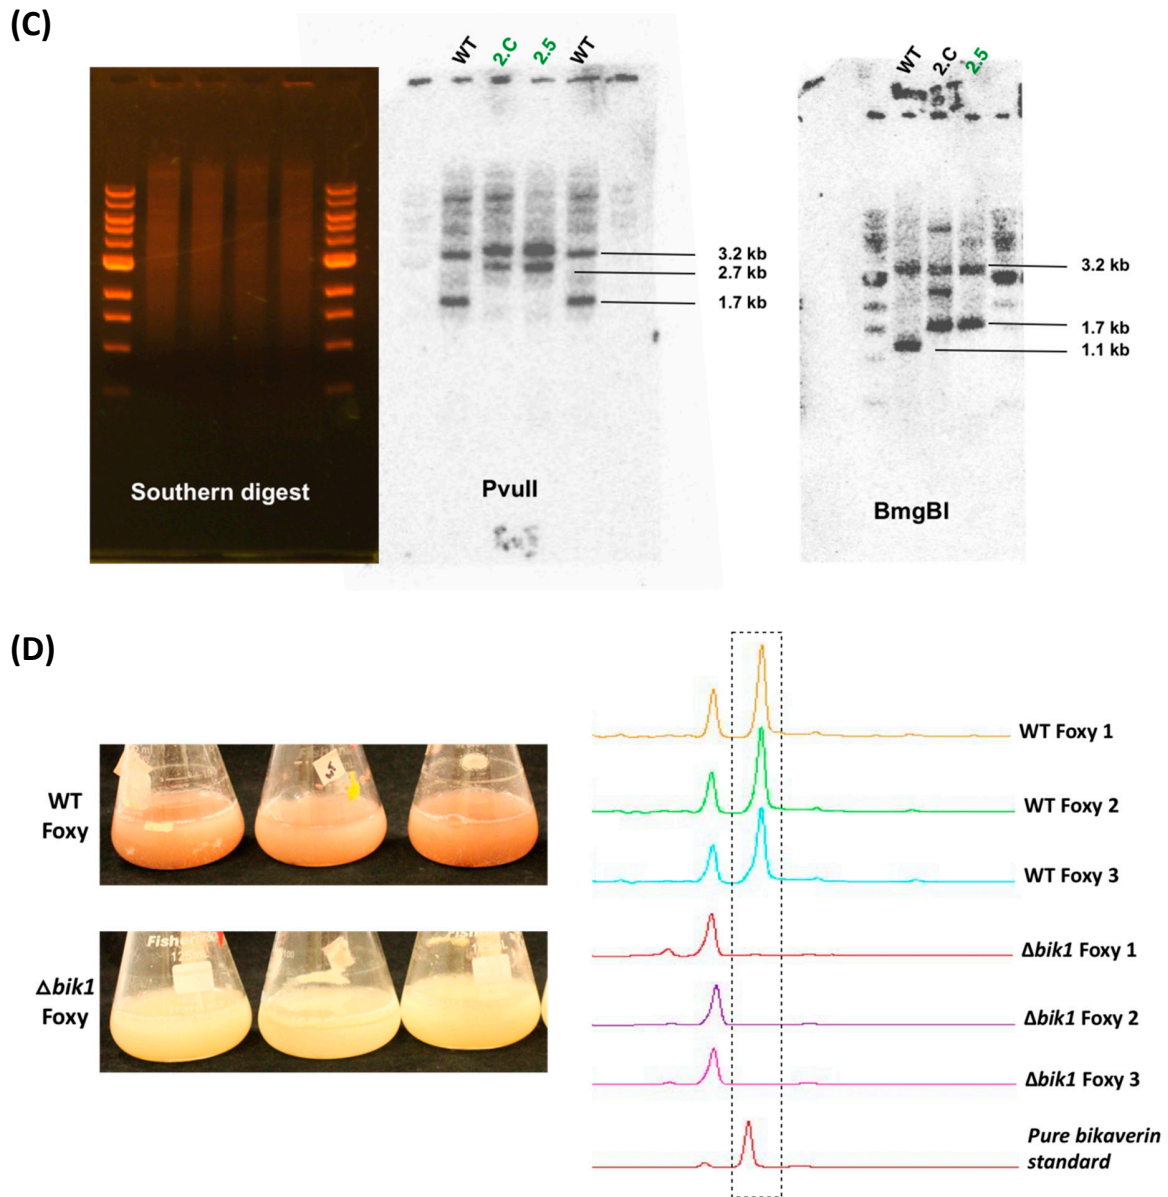

**Figure S6. *bik1* knockout construction and validation.** (A) Genomic context for *bik1* gene in *F. oxysporum*. The figure is a representation of sequence alignment between the *bik1* in *F. fujikuroi* (grey) and predicted orthologs in *F. oxysporum* identified based on protein and nucleotide blast (red). The orange region represents insufficient sequence information. (B) Schematic representation of the genetic construct used for *bik1* deletion in *F. oxysporum*. The construct was made using double fusion PCR and includes the *hph* gene that confers resistance to hygromycin (denoted in the figure as HygR). The flanking regions upstream and downstream of the *bik1* gene are denoted as 5' and 3' flanks and these enable homologous recombination. The restriction enzyme cut sites are indicated. (C) shows southern blot analyses of genomic DNA from the WT and  $\Delta bik1$  strains (2.C and 2.5). Ten micrograms of total DNA from each strain was digested with

the enzymes of interest and subjected to southern blot analysis with 5' flank and 3' flank fragments as probes (indicated in A). The size of the bands was identified with the New England Biolabs 1 kb DNA ladder. Strain 2.5 was chosen to be used as the  $\Delta bik1$  strain for future analyses. (D) Bikaverin production was analyzed from WT and  $\Delta bik1$  *F. oxysporum* strains. The strains were grown on PDA for 5 days at 30 °C and two plugs were transferred to 50 mL of liquid ICI media in 125 mL flasks. These were incubated at 30 °C for 1 week. The cultures were extracted with ethyl acetate and the crude extract was analyzed with HPLC. Pure bikaverin at 0.1 mg/mL was used as the standard.

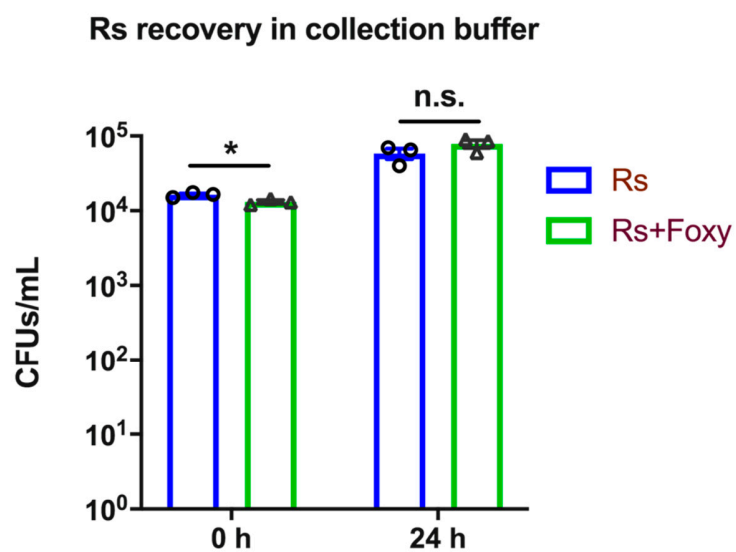

|      | Significant? | P value           |
|------|--------------|-------------------|
| 0 h  | Yes          | 0.036852397146530 |
| 24 h | No           | 0.202185643384270 |

**Figure S7. Co-culture of *R. solanacearum* and *F. oxysporum* in secretome collection buffer does not inhibit bacterial growth.** CFUs of the bacterium in single and co-cultures in the collection buffer used to obtain early infection secretome. 24 hours was chosen as the secretome is collect after a 24-hour incubation.

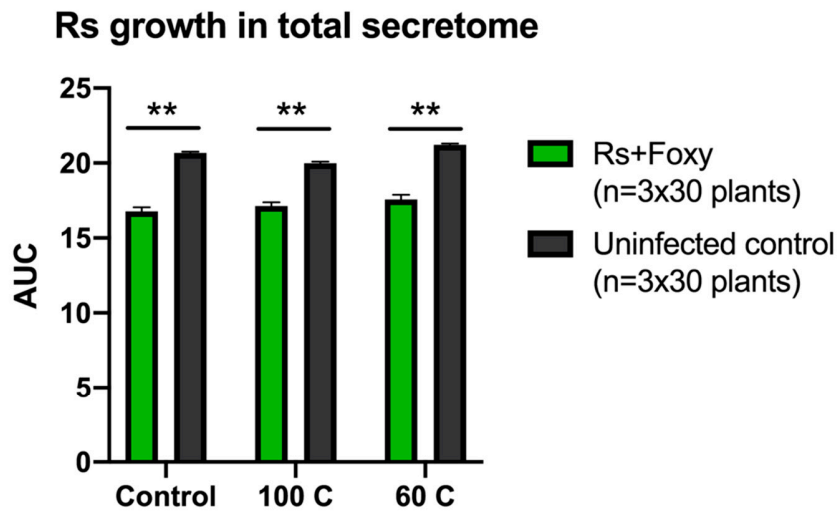

t-test

|         | Significant? | P value   |
|---------|--------------|-----------|
| Control | Yes          | <0.000001 |
| 100 C   | Yes          | <0.000001 |
| 60 C    | Yes          | <0.000001 |

**Figure S8. The bioactive molecules in the co-infection secretome do not degrade with heat.** Total secretomes from co-infected plants and uninfected control plants were heat treated at 100 °C (5 min) or 60 °C (2 hours) with room temperature control. *R. solanacearum* growth in the treated-secretomes were quantified with OD<sub>600</sub> and area under the growth curve (AUC) was calculated.

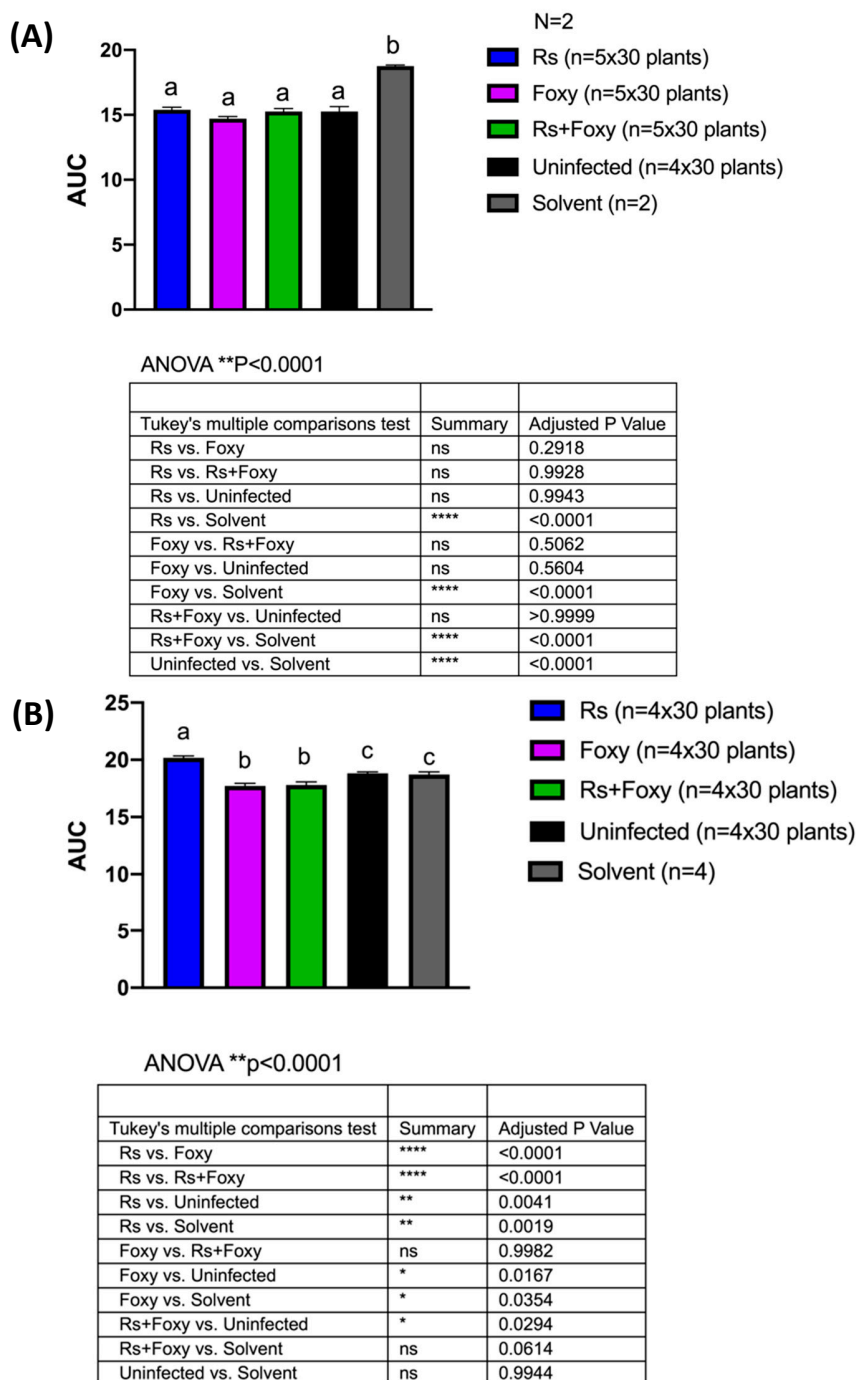

**Figure S9. *R. solanacearum* growth in secondary metabolite crude extracts eluted into hexane (A) and methanol (B).** The crude extracts were extracted from total secretomes in different solvents as mentioned. *R. solanacearum* growth in the treated-secretomes were quantified with OD600 and area under the growth curve (AUC) was calculated.

(A)

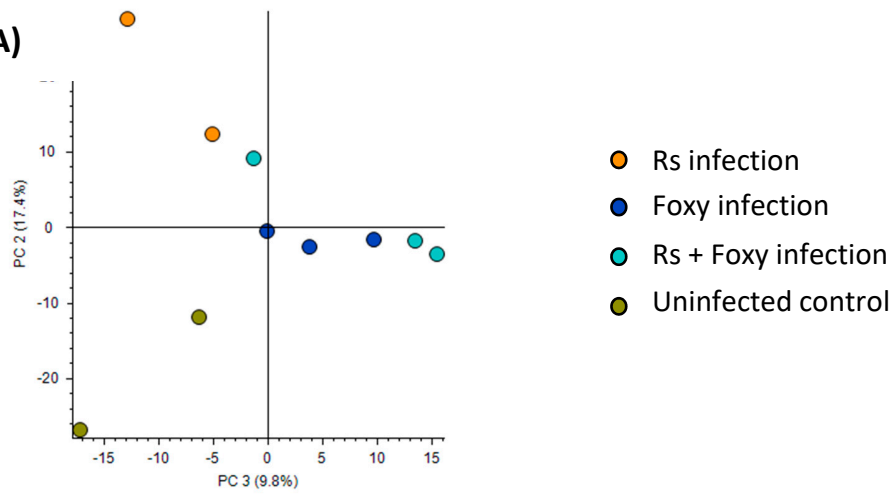

(B)

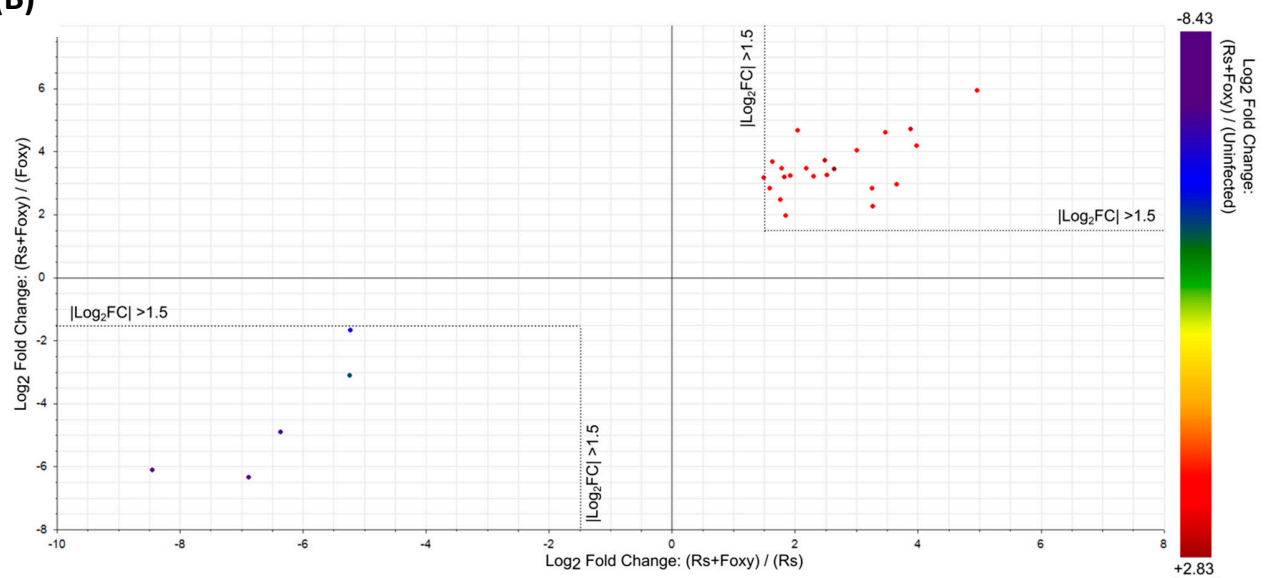

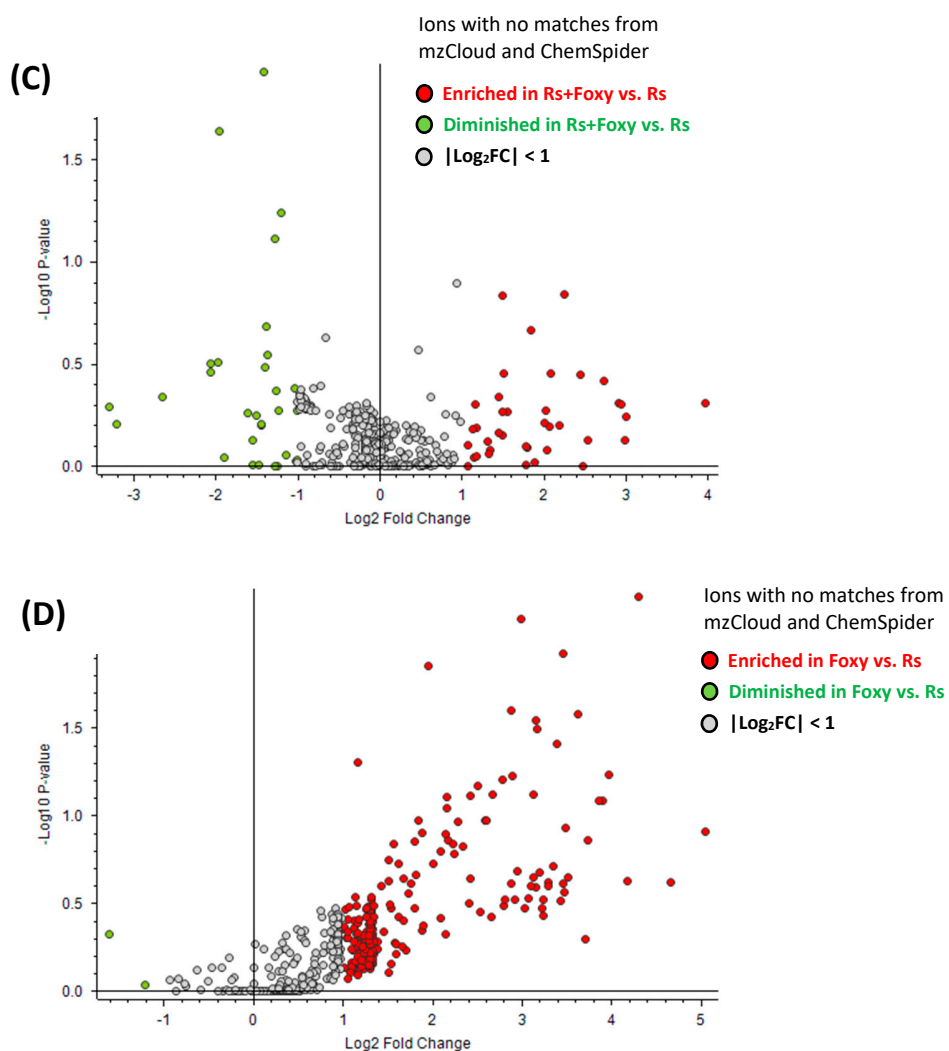

**Figure S10. Untargeted metabolomic analyses of crude extracts from single and co-infected secretomes.** (A) Ordination plot showing clustering of treatments. While 2/3 replicates of co-infection extract cluster together, one replicate lies between Rs and Foxy single-infections. (B) shows ions enriched (red) or diminished (purple/blue) exclusively in co-infections. Log<sub>2</sub> Fold change of the ions in co-infection compared to Rs single infection, Foxy single infection and uninfected control is plotted on the x-axis, y-axis and z-axis color scale respectively. A minimum Log<sub>2</sub> fold change of 1.5 is used as a threshold. Ions in the top right quadrant are enriched in co-infection compared to both Rs and Foxy single-infections and the uninfected control. Ions in the bottom left quadrant are diminished in co-infection compared to both Rs and Foxy single-infections and the uninfected control. (C) and (D) show ions that returned no matching annotations from mzCloud and ChemSpider. (C) shows ions enriched (red) or diminished (green) in Rs+Foxy co-infection compared to Rs single-infection. (D) shows ions enriched (red) or diminished (green) in Rs+Foxy co-infection compared to Foxy single-infection.

| Sample | Peak | ES-                  | ES+      | Formula                  | Formula     |            | Known?        |
|--------|------|----------------------|----------|--------------------------|-------------|------------|---------------|
| 10     | A    | 323.2335             |          | C18H34O5                 | C19H30ON4   |            |               |
|        |      |                      | 353.229  | C16H28O3N6               |             |            |               |
|        | B    | 667.2825             |          | C30H44O13N4              | C29H48O17   | C31H40O9N8 |               |
|        |      |                      | 640.3160 | C28H49O15N               |             |            |               |
|        | E    | 374.2448<br>420.2501 | 376.2588 | C21H33O3N3<br>C22H35O5N3 | C23H31ON7   |            | Terestigmine? |
| 12     | C    | 681.2977             |          | C30H50O17                | C32H42O9N8  |            | Salicinolide? |
|        |      |                      | 654.3315 | C38H39O2N9               | C30H47N5O11 |            |               |
|        | E    |                      |          | C21H33O3N3<br>C22H35O5N3 | C23H31ON7   |            |               |
| 13     | D    | 681.2080             |          | C31H46O13N4              | C30H50O17   | C32H42O9N8 |               |
|        |      |                      | 654.3315 | C38H39O2N9               |             |            |               |
|        | E    | 374.2448<br>420.2501 | 376.2588 | C21H33O3N3<br>C22H35O5N3 | C23H31ON7   |            |               |
|        |      |                      |          |                          |             |            |               |
| 14     | E    | 374.2448<br>420.2501 | 376.2588 | C21H33O3N3<br>C22H35O5N3 | C23H31ON7   |            |               |
| 15     | E    | 374.2448<br>420.2501 | 376.2588 | C21H33O3N3<br>C22H35O5N3 | C23H31ON7   |            |               |

**Table S1.** m/z values for compounds shown in the chromatograms from figure 4D and their formulas predicted by compound discoverer 3.2 and XCalibur software Version 3.1.66.10. The left-most column shows lists the fractions corresponding to Figure 4C,D and Figure 5.

| Fungal/bacterial strain                                         | Genotype                                      | Reference/Source                                                                           |
|-----------------------------------------------------------------|-----------------------------------------------|--------------------------------------------------------------------------------------------|
| <i>Fusarium oxysporum f. sp. lycopersici</i> 4287               | Wild Type                                     | Strain from Dr. Antonio Di Pietro, University of Córdoba, Spain. Di Pietro et al. 2004 [3] |
| $\Delta bik1$ <i>Fusarium oxysporum f. sp. lycopersici</i> 4287 | $\Delta bik1::Hyg^R$<br>(Wild Type as parent) | This study                                                                                 |
| <i>Fusarium oxysporum f. sp. tulipae</i> 26954                  | Wild Type                                     | Strain from Dr. Ernst Oliw, Uppsala University, Sweden. Oliw et al. 2019 [4]               |
| <i>Ralstonia solanacearum</i> GMI1000                           | Wild Type                                     | Strain from Dr. Caitilyn Allen, Univ. of Wisconsin-Madison, USA. Boucher et al. 1987 [5]   |

**Table S2.** List of strains used in the study.

| Primer Name                 | Primer (5' to 3')                               |
|-----------------------------|-------------------------------------------------|
| NV FOXY57<br>5'F<br>NESTFOR | ATGCGCCGTCTTCGTCAACA                            |
| NV FOXY57<br>5'F FOR        | AGGGCCTGCAACTACTCTTG                            |
| NV FOXY57<br>5'F REV        | TGGAGCTCCAATTCGCCCTATAGAGTGTTGCACCTGCATGATCCT   |
| NV FOXY58<br>3'F FOR        | TAGTGAGGGTTAATTGCGCGCTTGCTCCCCCGGGTAAACATAACACT |
| NV FOXY58<br>3'F<br>NESTREV | AGGCAATCGAGACTACCGGT                            |
| NV FOXY58<br>3'F REV        | ACGCATCTCGGAGAGAATGAC                           |
| NV HygB 5'F                 | TATAGGGCGAATTGGAGCTCCA                          |
| NV HygB 3'F                 | CAAGCGCGCAATTAACCCTCACTA                        |
| NV foxy<br>BIK1-int FOR     | GAGATGAGAACGCAGAAGGCC                           |
| NV foxy<br>BIK1-int REV     | GTGTTCTTGCGCTGGCCA                              |
| NV foxy<br>GPD-int FOR      | GCTGCCTCTCGATAAGTGGTG                           |
| NV foxy<br>GPD-int REV      | GACGTGAACTCCAGATGCTGG                           |

**Table S3. List of primers used in the study**

### References for supplementary material:

1. Olivain, C.; Humbert, C.; Nahalkova, J.; Fatehi, J.; L'Haridon, F.; Alabouvette, C. Colonization of tomato root by pathogenic and nonpathogenic *Fusarium oxysporum* strains inoculated together and separately into the soil. *Appl. Environ. Microbiol.* **2006**, *72*, 1523–1531, doi:10.1128/AEM.72.2.1523-1531.2006.
2. Lagopodi, A.L.; Ram, A.F.J.; Lamers, G.E.M.; Punt, P.J.; Van den Hondel, C.A.M.J.J.; Lugtenberg, B.J.J.; Bloemberg, G. V. Novel aspects of tomato root colonization and infection by *Fusarium oxysporum* f. sp. *radicis-lycopersici* Revealed by confocal laser scanning microscopic analysis using the green fluorescent protein as a marker. *Mol. Plant-Microbe Interact.* **2002**, *15*, 172–179, doi:10.1094/MPMI.2002.15.2.172.
3. Di Pietro, A.; García-Maceira, F.I.; Méglecz, E.; Roncero, M.I.G. A MAP kinase of the vascular wilt fungus *Fusarium oxysporum* is essential for root penetration and pathogenesis. *Mol. Microbiol.* **2004**, *39*, 1140–1152, doi:10.1111/j.1365-2958.2001.02307.x.
4. Oliw, E.H.; Hamberg, M. Biosynthesis of Jasmonates from Linoleic Acid by the Fungus *Fusarium oxysporum*. Evidence for a Novel Allene Oxide Cyclase. *Lipids* **2019**, *54*, 543–556, doi:10.1002/lipd.12180.
5. Boucher, C.A.; Van Gijsegem, F.; Barberis, P.A.; Arlat, M.; Zischek, C. *Pseudomonas solanacearum* genes controlling both pathogenicity on tomato and hypersensitivity on tobacco are clustered. *J. Bacteriol.* **1987**, *169*, 5626–5632, doi:10.1128/jb.169.12.5626-5632.1987.
